# Supplementary material
Source: Springer Nature journal article supplement (https://www.springermedizin.de/resource/supplementary/12883_2013_859_MOESM3_ESM.pdf/9456014)

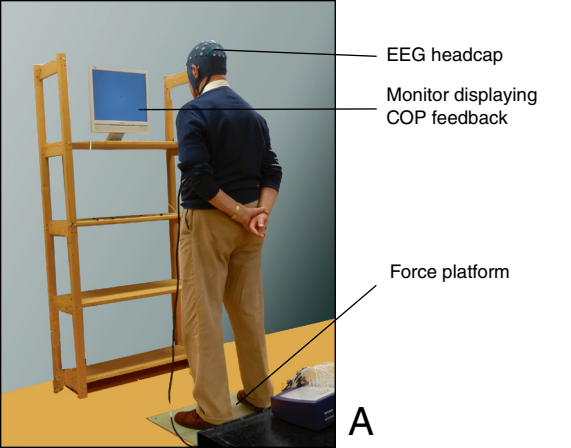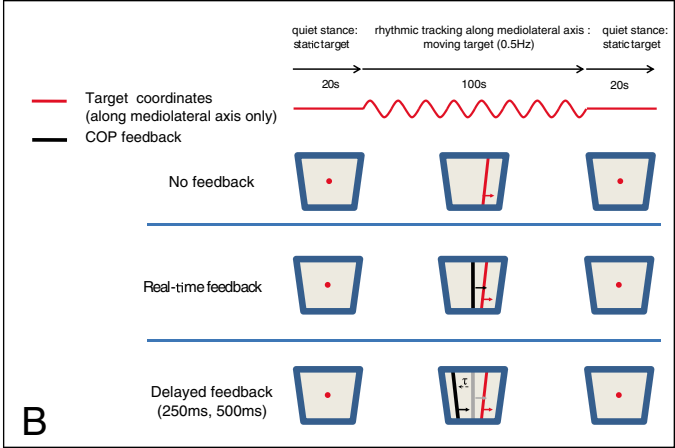

Supplement: MOESM3 [file 9456014]
